# Supplementary material for: Uncoupling of Bacterial and Terrigenous Dissolved Organic Matter Dynamics in Decomposition Experiments
Source: PubMed Central journal article supplement (PMC3981725; doi:10.1371/journal.pone.0093945), 2014-04-09
Supplement: pone.0093945.s003.pdf [file pone.0093945.s003.pdf]

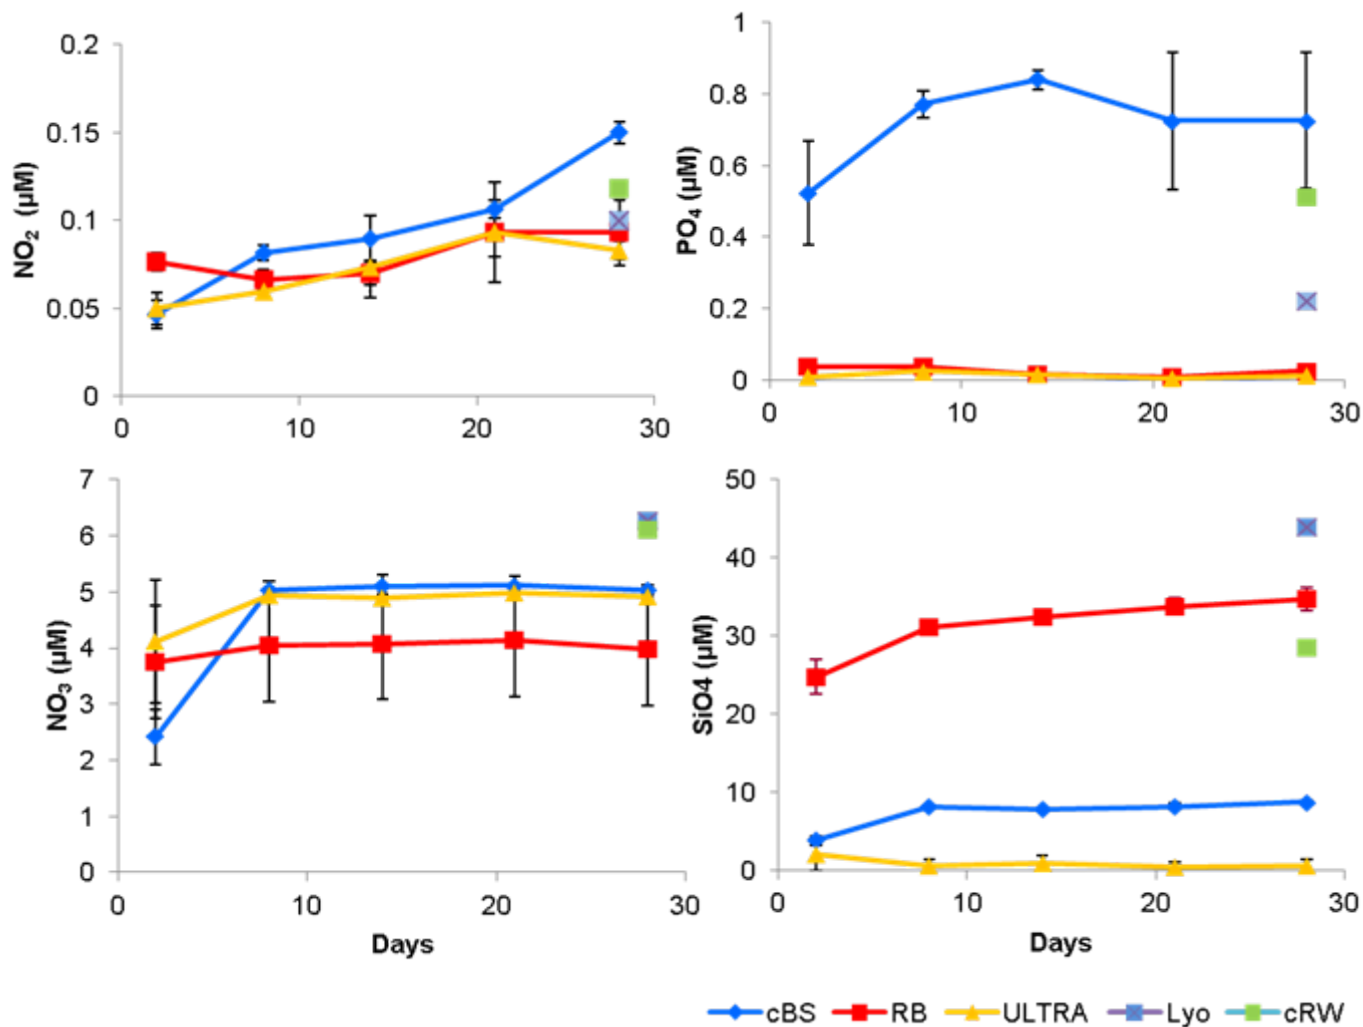

**Figure S3. Nutrients measured during the experiment.** Shown is the average concentration of three independent replicated mesocosms: (A) NO<sub>2</sub>, (B) PO<sub>4</sub>, (C) NO<sub>3</sub>, (D) SiO<sub>4</sub>. For abbreviation of the treatments see Fig 1.
