# Supplementary material for: Uncoupling of Bacterial and Terrigenous Dissolved Organic Matter Dynamics in Decomposition Experiments
Source: PubMed Central journal article supplement (PMC3981725; doi:10.1371/journal.pone.0093945), 2014-04-09
Supplement: pone.0093945.s006.pdf [file pone.0093945.s006.pdf]

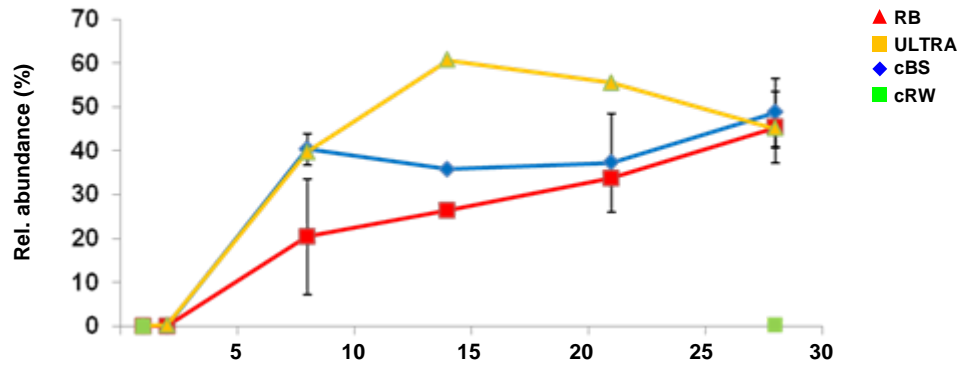

**Figure S6. Relative proportion of the *Paraperlucidibaca* assigned pyrosequencing reads in the mesocosms.** Shown is the relative average abundance of three replicated mesocosms. For abbreviation of the treatments see Fig 1.
