# Supplementary material for: Uncoupling of Bacterial and Terrigenous Dissolved Organic Matter Dynamics in Decomposition Experiments
Source: PubMed Central journal article supplement (PMC3981725; doi:10.1371/journal.pone.0093945), 2014-04-09
Supplement: pone.0093945.s007.pdf [file pone.0093945.s007.pdf]

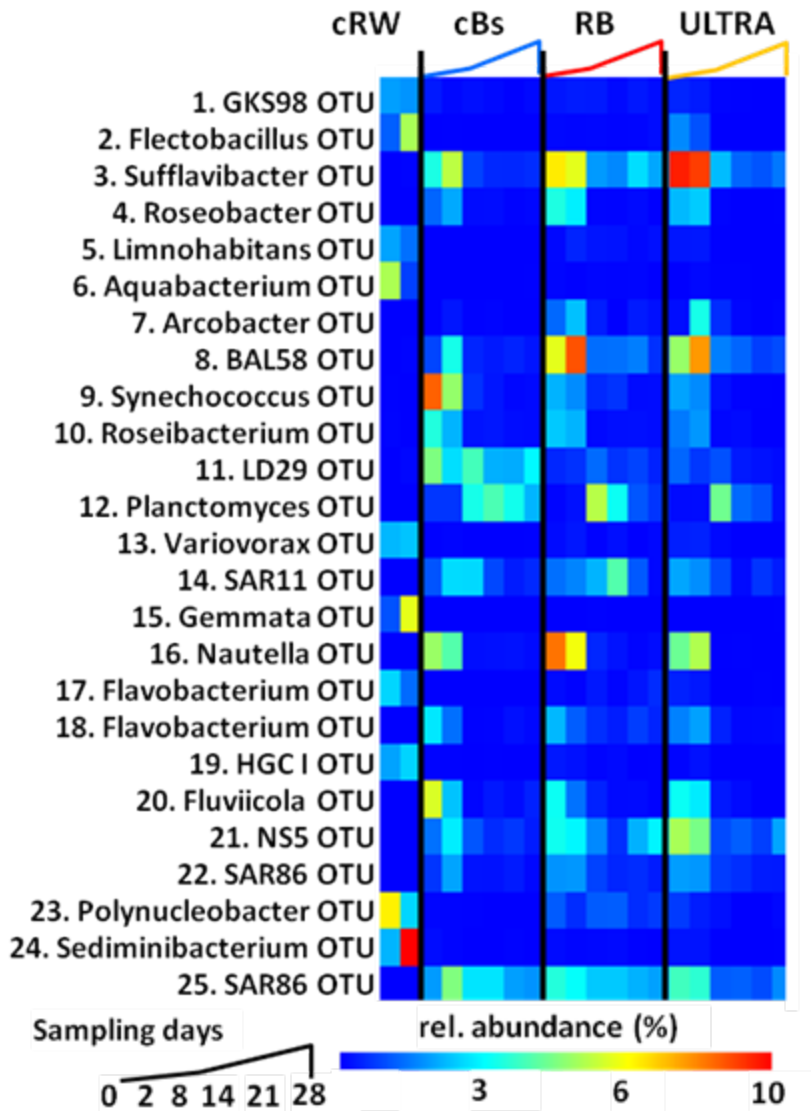

**Figure S7. Heatmap of the relative proportion of pyrosequencing reads assigned to an operational taxonomic unit (OTUs).** The heatmap shows OTUs of replicated mesocosms with high loadings ( $\pm 0.05$ ) in the Principle component analysis from the mesocosm experiments. For abbreviation of the treatments see Fig 1.
