# Supplementary material for: Uncoupling of Bacterial and Terrigenous Dissolved Organic Matter Dynamics in Decomposition Experiments
Source: PubMed Central journal article supplement (PMC3981725; doi:10.1371/journal.pone.0093945), 2014-04-09
Supplement: pone.0093945.s008.pdf [file pone.0093945.s008.pdf]

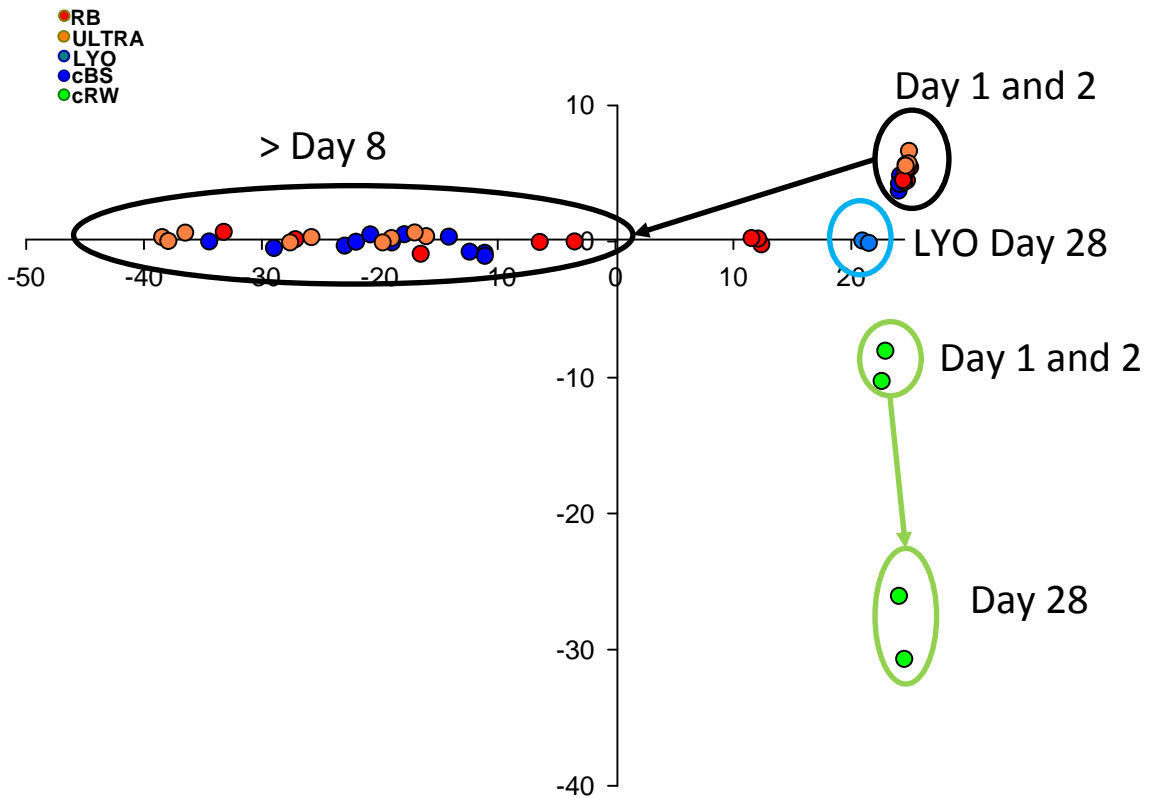

**Figure S8. Principle component analysis (PCA) of changes in the operational taxonomic units (OTU) composition during the experiment.** The PCA is basis for the OTU loadings in Figure S7. Eigenvalue PC1 = 80.6%; PC2 = 6.6 %; PC3 = 5.0. For abbreviation of the treatments see Fig 1.
