# Supplementary material for: Uncoupling of Bacterial and Terrigenous Dissolved Organic Matter Dynamics in Decomposition Experiments
Source: PubMed Central journal article supplement (PMC3981725; doi:10.1371/journal.pone.0093945), 2014-04-09
Supplement: pone.0093945.s009.pdf [file pone.0093945.s009.pdf]

**Table S1 Chemical composition of Artificial Sea Water (ASW).** Solutions (A), (B) and (C) were separately prepared with ultrapure water.

| A                 |                      | B                                   |                      | C                                |                      |
|-------------------|----------------------|-------------------------------------|----------------------|----------------------------------|----------------------|
| Elements          | (g L <sup>-1</sup> ) | Elements                            | (g L <sup>-1</sup> ) | Elements                         | (g L <sup>-1</sup> ) |
| NaCl              | 19.45                | MgCl <sub>2</sub> 6H <sub>2</sub> O | 12.59                | Na <sub>2</sub> HPO <sub>4</sub> | 0.008                |
| MgSO <sub>4</sub> | 3.24                 | CaCl <sub>2</sub> 2H <sub>2</sub> O | 2.38                 | NH <sub>4</sub> NO <sub>3</sub>  | 0.0016               |
|                   |                      | KCl                                 | 0.55                 |                                  |                      |
|                   |                      | FeCl <sub>3</sub> 6H <sub>2</sub> O | 0.1099               |                                  |                      |
|                   |                      | KBr                                 | 0.08                 |                                  |                      |
|                   |                      | SrCl <sub>2</sub>                   | 0.0572               |                                  |                      |
|                   |                      | H <sub>3</sub> BO <sub>3</sub>      | 0.022                |                                  |                      |
|                   |                      | NaF                                 | 0.0024               |                                  |                      |
