# Supplementary material for: Uncoupling of Bacterial and Terrigenous Dissolved Organic Matter Dynamics in Decomposition Experiments
Source: PubMed Central journal article supplement (PMC3981725; doi:10.1371/journal.pone.0093945), 2014-04-09
Supplement: pone.0093945.s010.pdf [file pone.0093945.s010.pdf]

**Table S2. Experimental set up and conditions of the mesocosms.** Abbreviations for treatments as in Fig. 1, solutions A, B, C see Table S1.

|                                           | Volume (L) | (C)<br>( $\mu$ l) | (A)<br>(ml) | (B)<br>(ml) | Baltic Sea<br>water<br>(L) | Ultrapure<br>water<br>(L) | tDOM source                               | Salinity       | pH  |
|-------------------------------------------|------------|-------------------|-------------|-------------|----------------------------|---------------------------|-------------------------------------------|----------------|-----|
| River water<br>and Sea<br>water<br>(RB)   | 25         | 683               | 364         | 643         | 12                         | -                         | 12 l River<br>water                       | 8.3 $\pm$ 0.2  | 7.3 |
| Sea water<br>control<br>(cBS)             | 25         | -                 | -           | -           | 25                         | -                         | -                                         | 8.1 $\pm$ 0.1  | 8   |
| Retentate<br>and<br>Sea water<br>(ULTRA)  | 15         | 410               | 228         | 404         | 7.5                        | 6.581                     | 919 ml<br>retentate                       | 8.4 $\pm$ 0.2  | 7.3 |
| Lyophilisate<br>and Sea<br>water<br>(LYO) | 1.6        | 41                | 23          | 55          | -                          | 0.689                     | 67 ml of<br>lyphilisated<br>DOM           | -              | -   |
| River water<br>control<br>(cRW)           | 4          | 109               | -           | -           | -                          | -                         | 2 l filtered RW<br>+ 2 l unfiltered<br>RW | 0.1 $\pm$ 0.01 | 7.9 |
