# Supplementary material for: Uncoupling of Bacterial and Terrigenous Dissolved Organic Matter Dynamics in Decomposition Experiments
Source: PubMed Central journal article supplement (PMC3981725; doi:10.1371/journal.pone.0093945), 2014-04-09
Supplement: pone.0093945.s012.pdf [file pone.0093945.s012.pdf]

**Table S4. Statistical analysis of the dissolved organic carbon DOC decomposition in the experiments.** (A) DOC decomposition in the mesocosms (same abbreviations as in Fig. 1). (B) Based on the DOC reduction, no significant difference in a one-way ANOVA test can be determined.

**A**

|         | DOC ( $\mu\text{M}$ ) |        |           |
|---------|-----------------------|--------|-----------|
|         | day 1                 | day 28 | reduction |
| ULTRA 1 | 381                   | 353    | 28        |
| ULTRA 2 | 377                   | 351    | 26        |
| ULTRA 3 | 388                   | 360    | 28        |
| RB 1    | 299                   | 268    | 32        |
| RB 2    | 347                   | 271    | 76        |
| RB 3    | 315                   | 269    | 47        |
| cBS 1   | 342                   | 309    | 33        |
| cBS 2   | 317                   | 307    | 10        |
| cBS 3   | 342                   | 309    | 33        |
| cRW 1   | 403                   | 370    | 33        |
| cRW 2   | 399                   | nd     | nd        |
| cRW 3   | 401                   | 370    | 31        |

**B**

|                 | Sum of sqrs | df | Mean square | F     | p(same) |
|-----------------|-------------|----|-------------|-------|---------|
| Between groups: | 1324.95     | 3  | 441.649     | 2.332 | 0.1606  |
| Within groups:  | 1325.88     | 7  | 189.412     |       |         |
| Total:          | 2650.83     | 10 |             |       |         |
