# Supplementary material for: Uncoupling of Bacterial and Terrigenous Dissolved Organic Matter Dynamics in Decomposition Experiments
Source: PubMed Central journal article supplement (PMC3981725; doi:10.1371/journal.pone.0093945), 2014-04-09
Supplement: pone.0093945.s013.pdf [file pone.0093945.s013.pdf]

**Table S5. Bacterial activity and bacterial growth efficiency.** Bacterial activity estimated by [<sup>3</sup>H]-thymidine incorporation and oxygen consumption measured by a luminescence-based optical sensor (nd= not determined; same abbreviations as in Fig. 1).

|                | Thymidine incorporation<br>(pmol h <sup>-1</sup> L <sup>-1</sup> ) | Carbon-production<br>(µg C L <sup>-1</sup> h <sup>-1</sup> ) | Oxygen consumption<br>(mg L <sup>-1</sup> d <sup>-1</sup> ) | Bacterial carbon demand<br>(µg C L <sup>-1</sup> h <sup>-1</sup> ) | Bacterial growth efficiency |
|----------------|--------------------------------------------------------------------|--------------------------------------------------------------|-------------------------------------------------------------|--------------------------------------------------------------------|-----------------------------|
| <b>1 day</b>   |                                                                    |                                                              |                                                             |                                                                    |                             |
| cBS1           | 114                                                                | 4.3                                                          | 0.05                                                        | 6.09                                                               | 0.70                        |
| cBS2           | 41                                                                 | 1.5                                                          | nd                                                          | nd                                                                 | nd                          |
| cBS3           | 70                                                                 | 2.6                                                          | nd                                                          | nd                                                                 | nd                          |
| RB1            | 38                                                                 | 1.4                                                          | 0.01                                                        | nd                                                                 | nd                          |
| RB2            | 23                                                                 | 0.9                                                          | 0.08                                                        | 3.79                                                               | 0.23                        |
| RB3            | 66                                                                 | 2.5                                                          | nd                                                          | nd                                                                 | nd                          |
| ULTRA1         | 39                                                                 | 1.5                                                          | 0.32                                                        | 13.19                                                              | 0.11                        |
| ULTRA2         | 39                                                                 | 1.5                                                          | 0.12                                                        | 5.88                                                               | 0.25                        |
| ULTRA3         | 34                                                                 | 1.3                                                          | nd                                                          | nd                                                                 | nd                          |
| <b>6 days</b>  |                                                                    |                                                              |                                                             |                                                                    |                             |
| cBS1           | 40                                                                 | 1.5                                                          | 0.29                                                        | 12.15                                                              | 0.12                        |
| cBS2           | 32                                                                 | 1.2                                                          | 0.11                                                        | 5.23                                                               | 0.23                        |
| cBS3           | 37                                                                 | 1.4                                                          | 0.29                                                        | 12.01                                                              | 0.11                        |
| RB1            | 31                                                                 | 1.2                                                          | 0.35                                                        | 13.99                                                              | 0.08                        |
| RB2            | 45                                                                 | 1.7                                                          | 0.39                                                        | 15.99                                                              | 0.11                        |
| RB3            | 41                                                                 | 1.5                                                          | 0.78                                                        | 30.12                                                              | 0.05                        |
| ULTRA1         | 28                                                                 | 1.1                                                          | 0.18                                                        | 7.67                                                               | 0.14                        |
| ULTRA2         | 31                                                                 | 1.1                                                          | 0.52                                                        | 20.21                                                              | 0.06                        |
| ULTRA3         | 23                                                                 | 0.9                                                          | 0.43                                                        | 16.62                                                              | 0.05                        |
| <b>14 days</b> |                                                                    |                                                              |                                                             |                                                                    |                             |
| cBS1           | 10                                                                 | 0.4                                                          | 1.47                                                        | 54.27                                                              | 0.01                        |
| cBS2           | 12                                                                 | 0.5                                                          | 0.12                                                        | 4.87                                                               | 0.10                        |
| cBS3           | 11                                                                 | 0.4                                                          | nd                                                          | nd                                                                 | nd                          |
| RB1            | 15                                                                 | 0.5                                                          | 0.1                                                         | 4.21                                                               | 0.13                        |
| RB2            | 19                                                                 | 0.7                                                          | 0.1                                                         | 4.36                                                               | 0.16                        |
| RB3            | 14                                                                 | 0.5                                                          | nd                                                          | nd                                                                 | nd                          |
| ULTRA1         | 14                                                                 | 0.5                                                          | 0.12                                                        | 4.91                                                               | 0.10                        |
| ULTRA2         | 18                                                                 | 0.7                                                          | 0.23                                                        | 9.12                                                               | 0.08                        |
| ULTRA3         | 14                                                                 | 0.5                                                          |                                                             |                                                                    |                             |
| <b>21 days</b> |                                                                    |                                                              |                                                             |                                                                    |                             |
| cBS1           | 19                                                                 | 0.7                                                          | 1.31                                                        | 48.74                                                              | 0.01                        |
| cBS2           | 20                                                                 | 0.8                                                          | 0.56                                                        | 21.30                                                              | 0.04                        |
| cBS3           | 22                                                                 | 0.8                                                          | 0.57                                                        | 21.73                                                              | 0.04                        |
| RB1            | 27                                                                 | 1.0                                                          | 0.2                                                         | 8.35                                                               | 0.12                        |
| RB2            | 27                                                                 | 1.0                                                          | 0.1                                                         | 4.67                                                               | 0.21                        |
| RB3            | 23                                                                 | 0.9                                                          | nd                                                          | nd                                                                 | nd                          |
| ULTRA1         | 31                                                                 | 1.2                                                          | 0.26                                                        | 10.70                                                              | 0.11                        |
| ULTRA2         | 29                                                                 | 1.1                                                          | 0.29                                                        | 11.73                                                              | 0.09                        |
| ULTRA3         | 26                                                                 | 1.0                                                          | 0.16                                                        | 6.86                                                               | 0.14                        |
| <b>28 days</b> |                                                                    |                                                              |                                                             |                                                                    |                             |
| cBS1           | nd                                                                 | nd                                                           | nd                                                          | nd                                                                 | nd                          |
| cBS2           | 40                                                                 | 1.5                                                          | 0.1                                                         | 5.16                                                               | 0.29                        |
| cBS3           | 32                                                                 | 1.2                                                          | nd                                                          | nd                                                                 | nd                          |
| RB1            | 27                                                                 | 1.0                                                          | 0.44                                                        | 17.16                                                              | 0.06                        |
| RB2            | 22                                                                 | 0.8                                                          | 0.38                                                        | 14.77                                                              | 0.06                        |
| RB3            | 28                                                                 | 1.0                                                          | 0.29                                                        | 11.67                                                              | 0.09                        |
| ULTRA1         | 23                                                                 | 0.9                                                          | 0.42                                                        | 16.27                                                              | 0.05                        |
| ULTRA2         | 15                                                                 | 0.6                                                          | 0.25                                                        | 9.73                                                               | 0.06                        |
| ULTRA3         | 23                                                                 | 0.9                                                          | 0.32                                                        | 12.59                                                              | 0.07                        |
