# Supplementary material for: Uncoupling of Bacterial and Terrigenous Dissolved Organic Matter Dynamics in Decomposition Experiments
Source: PubMed Central journal article supplement (PMC3981725; doi:10.1371/journal.pone.0093945), 2014-04-09
Supplement: pone.0093945.s014.pdf [file pone.0093945.s014.pdf]

**Table S6. Nanoflagellate counts ( $\text{ml}^{-1}$ ) in the mesocosms. For abbreviations see Fig. 1.**

|        | Day 1 | Day 2 | Day 8 |
|--------|-------|-------|-------|
| cBS1   | 3043  | 2088  | 1909  |
| cBS2   | 6205  | 2566  | 895   |
| cBS3   | 5489  | 3162  | 1671  |
| RB1    | 3938  | 835   | 1372  |
| RB2    | 3162  | 1760  | 1611  |
| RB3    | 3341  | 2715  | 1432  |
| ULTRA1 | 2566  | 626   | 955   |
| ULTRA2 | 2924  | 1820  | 2446  |
| ULTRA3 | 2864  | 1551  | 2208  |
