# Supplementary material for: Uncoupling of Bacterial and Terrigenous Dissolved Organic Matter Dynamics in Decomposition Experiments
Source: PubMed Central journal article supplement (PMC3981725; doi:10.1371/journal.pone.0093945), 2014-04-09
Supplement: pone.0093945.s016.pdf [file pone.0093945.s016.pdf]

**Table S8. Loadings of a PCA analysis of the operational taxonomic units (OTUs) in the experiments.** Loadings of a PCA analysis indicating OTUs contributing > 0.05 or < 0.05 to a principle component.

|                           | Axis 1    | Axis 2    | Axis 3    |
|---------------------------|-----------|-----------|-----------|
| (A) Perlucibaca OTU       | 0.9675    | -0.02551  | -0.1901   |
| (B) Alteromonas OTU       | 0.1488    | 0.028     | 0.9284    |
| 12. Planctomyces OTU      | 0.02664   | -0.009439 | 0.1461    |
| 11. LD29 OTU              | 0.002604  | -0.05466  | 0.07214   |
| 17. Flavobacterium OTU    | -0.008971 | 0.08051   | -0.01981  |
| 5. Limnohabitans OTU      | -0.009954 | 0.06035   | -0.01147  |
| 1. GKS98 OTU              | -0.0108   | 0.06063   | -0.01045  |
| 19. HGC I OTU             | -0.01088  | 0.07244   | -0.009628 |
| 13. Variovorax OTU        | -0.01174  | 0.07724   | -0.01398  |
| 6. Aquabacterium OTU      | -0.01221  | 0.1528    | -0.02328  |
| 15. Gemmata OTU           | -0.01297  | 0.0837    | -0.002991 |
| 14. SAR11 OTU             | -0.01847  | -0.06628  | -0.005947 |
| 2. Flectobacillus OTU     | -0.01877  | 0.06214   | -0.01332  |
| 7. Arcobacter OTU         | -0.01951  | -0.05798  | -0.02835  |
| 22. SAR86 OTU             | -0.02228  | -0.06466  | -0.01861  |
| 18. Flavobacterium OTU    | -0.02372  | -0.06623  | -0.02811  |
| 24. Sediminibacterium OTU | -0.02389  | 0.1404    | -0.007044 |
| 23. Polynucleobacter OTU  | -0.02392  | 0.1839    | -0.04068  |
| 25. SAR86 OTU             | -0.02515  | -0.1318   | 0.02489   |
| 10. Roseibacterium OTU    | -0.0313   | -0.08054  | -0.02488  |
| 21. NS5 OTU               | -0.03225  | -0.1332   | -0.0706   |
| 4. Roseobacter OTU        | -0.03556  | -0.09096  | -0.0329   |
| 20. Fluviicola OTU        | -0.04179  | -0.1075   | -0.02778  |
| 9. Synechococcus OTU      | -0.04664  | -0.1138   | -0.02865  |
| 8. BAL58 OTU              | -0.06792  | -0.2094   | -0.09361  |
| 16. Nautella OTU          | -0.08009  | -0.2034   | -0.07552  |
| 3. Sufflavibacter OTU     | -0.08117  | -0.2528   | -0.1186   |
