# Supplementary material for: Uncoupling of Bacterial and Terrigenous Dissolved Organic Matter Dynamics in Decomposition Experiments
Source: PLoS One. 2014 Apr 9;9(4):e93945. doi: 10.1371/journal.pone.0093945 (PMC3981725; doi:10.1371/journal.pone.0093945)
Supplement: Table S7 — ANOSIM test of the dissolved organic matter composition. ANOSIM test of all day 0 and day 28 samples from the treatments based on Bray Curtis dissimilarity, calculated with PAST, (A) represent the R- values and (B) the uncorrected p-values. (PDF) [file pone.0093945.s015.pdf]

ANOSIM test of all day 0 and day 28 samples from the treatments based on Bray Curtis dissimilarity, calculated with PAST, (A) represent the R- values and (B) the uncorrected p-values.

|           | Day 0 LYO | Day 28 LYO | Day 0 cBS | Day 28 cBS | Day 0 cRW | Day 28 cRW | Day 0 RB | Day 28 RB | Day 0 Ultra |
|-----------|-----------|------------|-----------|------------|-----------|------------|----------|-----------|-------------|
| d28 LYO   | 0,3704    |            |           |            |           |            |          |           |             |
| d0 OST    | 1         | 1          |           |            |           |            |          |           |             |
| d28 OST   | 1         | 1          | 0,03704   |            |           |            |          |           |             |
| d0 cRW    | 0,7037    | 0,7778     | 1         | 1          |           |            |          |           |             |
| d28 cRW   | 1         | 1          | 1         | 1          | -0,03704  |            |          |           |             |
| d0 RB     | 0,5556    | 0,7037     | 1         | 1          | 0,9259    | 1          |          |           |             |
| d28 RB    | 0,5833    | 1          | 1         | 1          | 0,8333    | 1          | -0,3333  |           |             |
| d0 Ultra  | 1         | 1          | 1         | 1          | 0,5556    | 1          | 1        | 1         |             |
| d28 Ultra | 1         | 1          | 1         | 1          | 0,5556    | 1          | 1        | 1         | 0,4444      |

[illegible]
